# Supplementary material
Source: Springer Nature journal article supplement (https://www.springermedizin.de/resource/supplementary/13054_2013_2577_MOESM1_ESM.pdf/9714284)
Supplement: MOESM1 [file 9714284]

## Additional File 1

**Table S1.** Target genes primer sequence

|           | <b>Sense</b>                | <b>Antisense</b>            |
|-----------|-----------------------------|-----------------------------|
| IL-6      | 5'-CTCCGCAAGAGACTTCCAG-3'   | 5'-CTCCTCTCCGGACTTGTG A-3'  |
| Caspase-3 | 5'-GGCCGACTTCCTGTATGC-3'    | 5'-GCGCAAAGTGACTGGATG-3'    |
| PCIII     | 5'-ACCTGGACCACAAGGACAC-3'   | 5'-TGGACCCATTTACCTTTC-3'    |
| RAGE      | 5'-TGA ACTCACAGCCAATGTCC-3' | 5'-ACA ACTGTCCCTTTGCCATC-3' |
| VCAM-1    | 5'-TGCACGGTCCCTAATGTGTA-3'  | 5'-TGCCAATTTCCCTCCCTTAAA-3' |
| 36B4      | 5'-AATCCTGAGCGATGTGCAG-3'   | 5'-GCTGCCATTGTCAAACAC-3'    |

Primers used in experiments. IL-6: interleukin, PCIII: type III pro-collagen, RAGE: receptor for advanced glycation end-products, and VCAM-1: vascular cell adhesion molecule-1.
